# Supplementary material for: Therapeutic Effects of Nanoparticles Loaded with Combined Sense and Anti-Sense of EpoR Plasmids to Enhance Angiogenesis
Source: Research Square preprint supplement (doi:10.21203/rs.3.rs-9718352/v1), 2026-06-11
Supplement: Supplementary file 1 [file 6e2f7c19d087484fc8bf572e.pdf]

## Supplemental figure

Cropped images of GAPDH

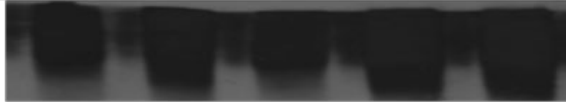

Full blot images of GAPDH

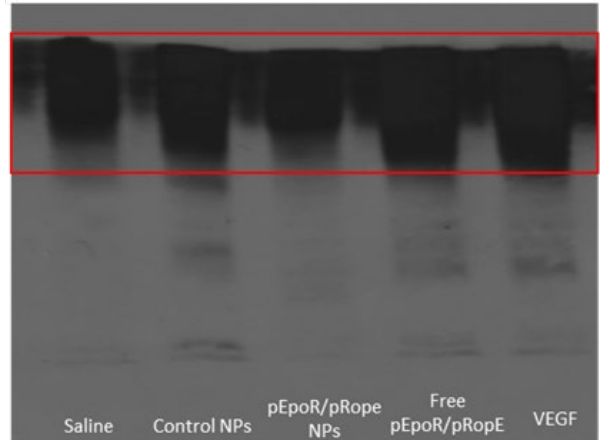

Cropped images of EpoR

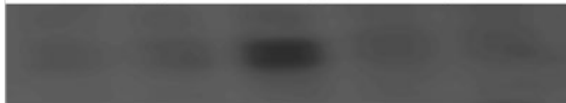

Full blot images of EpoR

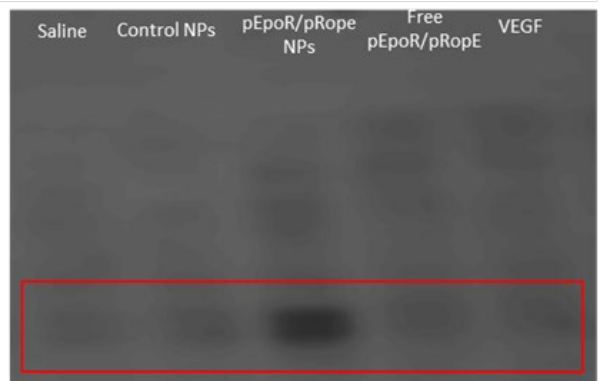

**Supplemental figure. Full uncropped membrane images for the Western blot data in Figure 5C.** The original, uncropped membrane images used to generate the cropped Western blot panels for EpoR and GAPDH in Figure 5C are presented. For each target protein, the full-length blot is displayed directly to the right of its corresponding cropped panel, with the region of interest and molecular weight marker locations indicated.
